# Supplementary material for: Global Temporal Patterns of Age Group and Sex Distributions of COVID-19
Source: MDPI journal article supplement (doi:10.3390/idr13020054), 2021-06-21
Supplement: s1 [file s1]

**Table S1. Summary data sources, data availability, and collected data for 15 countries included in analyses.**

| Country     | Population size | Data source (weblink)                                                                                                                                                                                                                                                                                                                                         | Time period of data availability | Total COVID-19 infections from Worldometers (our collected data) | Total COVID-19 deaths from Worldometers (our collected data) |
|-------------|-----------------|---------------------------------------------------------------------------------------------------------------------------------------------------------------------------------------------------------------------------------------------------------------------------------------------------------------------------------------------------------------|----------------------------------|------------------------------------------------------------------|--------------------------------------------------------------|
| Brazil      | 210,147,125     | <a href="https://www.saude.gov.br/boletins-epidemiologicos">https://www.saude.gov.br/boletins-epidemiologicos</a>                                                                                                                                                                                                                                             | Jun 14, 2020 - Oct 10, 2020      | 5,091,840 (hospitalizations: 326,097)                            | 150,236 (107,726)                                            |
| Canada      | 37,971,020      | <a href="https://resources-covid19canada.hub.arcgis.com/datasets/compiled-covid-19-case-details-canada/data">https://resources-covid19canada.hub.arcgis.com/datasets/compiled-covid-19-case-details-canada/data</a>                                                                                                                                           | Jan 1, 2020 - Dec 29, 2020       | 565,506 (274,038)                                                | 15,378 (4,477)                                               |
| Chile       | 17,574,003      | <a href="https://www.minsal.cl/nuevo-coronavirus-2019-ncov/informe-epidemiologico-covid-19/">https://www.minsal.cl/nuevo-coronavirus-2019-ncov/informe-epidemiologico-covid-19/</a>                                                                                                                                                                           | May 24, 2020 - Dec 23, 2020      | 590,914 (591,168)                                                | 16,288 (no death data)                                       |
| Germany     | 83,149,300      | <a href="https://www.kaggle.com/headsortails/covid19-tracking-germany">https://www.kaggle.com/headsortails/covid19-tracking-germany</a>                                                                                                                                                                                                                       | Jan 28, 2020 - Jan 1, 2021       | 1773,540 (522,550)                                               | 34,859 (23,020)                                              |
| India       | 1,326,093,247   | <a href="https://github.com/covid19india/api">https://github.com/covid19india/api</a>                                                                                                                                                                                                                                                                         | Jan 26, 2020 - Dec 21, 2020      | 10,075,422 (hospitalizations: 105,251)                           | 146,145 (10,210)                                             |
| Italy       | 60,317,116      | <a href="https://www.epicentro.iss.it/coronavirus/aggiornamenti">https://www.epicentro.iss.it/coronavirus/aggiornamenti</a>                                                                                                                                                                                                                                   | Mar 13, 2020 - Dec 29, 2020      | 2,067,487 (2,036,877)                                            | 73,029 (70,428)                                              |
| Netherlands | 17,418,808      | <a href="https://data.rivm.nl/covid-19/">https://data.rivm.nl/covid-19/</a>                                                                                                                                                                                                                                                                                   | Jan 1, 2020 - Dec 31, 2020       | 796,981 (787,617)                                                | 11,529 (11,210)                                              |
| New Zealand | 4,942,500       | <a href="https://www.health.govt.nz/our-work/diseases-and-conditions/covid-19-novel-coronavirus/covid-19-current-situation/covid-19-current-cases/covid-19-current-cases-details">https://www.health.govt.nz/our-work/diseases-and-conditions/covid-19-novel-coronavirus/covid-19-current-situation/covid-19-current-cases/covid-19-current-cases-details</a> | Feb 26, 2020 - Aug 30, 2020      | 1729 (1,306)                                                     | 22 (no death data)                                           |

|                |             |                                                                                                                                                                                                                                                                                                                                                                                                                                                                                                                                                                                                                                                                                                                                                          |                             |                            |                      |
|----------------|-------------|----------------------------------------------------------------------------------------------------------------------------------------------------------------------------------------------------------------------------------------------------------------------------------------------------------------------------------------------------------------------------------------------------------------------------------------------------------------------------------------------------------------------------------------------------------------------------------------------------------------------------------------------------------------------------------------------------------------------------------------------------------|-----------------------------|----------------------------|----------------------|
| Peru           | 32,824,358  | <a href="https://www.minsa.gob.pe/datosabiertos/">https://www.minsa.gob.pe/datosabiertos/</a>                                                                                                                                                                                                                                                                                                                                                                                                                                                                                                                                                                                                                                                            | Mar 18, 2020 - Dec 29, 2020 | 1,010,496<br>(949,373)     | 37,574<br>(32,499)   |
| Portugal       | 10,295,909  | <a href="https://covid19.minsaude.pt/relatorio-de-situacao/">https://covid19.minsaude.pt/relatorio-de-situacao/</a>                                                                                                                                                                                                                                                                                                                                                                                                                                                                                                                                                                                                                                      | Mar 25, 2020 - Aug 11, 2020 | 56,499<br>(50,504)         | 1,761<br>(1,728)     |
| South Africa   | 69,622,350  | <a href="https://www.nicd.ac.za/wp-content/uploads/2020/05/2020-04-30-COVID-19WklyEpiBriefFinal_Week18.pdf">https://www.nicd.ac.za/wp-content/uploads/2020/05/2020-04-30-COVID-19WklyEpiBriefFinal_Week18.pdf</a>                                                                                                                                                                                                                                                                                                                                                                                                                                                                                                                                        | Apr 20, 2020 - Dec 26, 2020 | 994,911<br>(845,989)       | 26,973<br>(14,605)   |
| South Korea    | 51,270,000  | <a href="https://www.cdc.go.kr/board/board.es?mid=a30501000000&amp;bid=0031&amp;cg_code=C04">https://www.cdc.go.kr/board/board.es?mid=a30501000000&amp;bid=0031&amp;cg_code=C04</a>                                                                                                                                                                                                                                                                                                                                                                                                                                                                                                                                                                      | Mar 29, 2020 - Aug 8, 2020  | 14,562<br>(4,357)          | 304<br>(151)         |
| Turkey         | 83,154,997  | <a href="https://sbsgm.saglik.gov.tr/TR,66560/haftalik-rapor--weekly-report.html">https://sbsgm.saglik.gov.tr/TR,66560/haftalik-rapor--weekly-report.html</a>                                                                                                                                                                                                                                                                                                                                                                                                                                                                                                                                                                                            | Jun 29, 2020 - Oct 25, 2020 | 984,114<br>(164,516)       | 9,799<br>(4702)      |
| United Kingdom | 55,268,100  | <a href="https://www.gov.uk/government/publications/national-covid-19-surveillance-reports">https://www.gov.uk/government/publications/national-covid-19-surveillance-reports</a>                                                                                                                                                                                                                                                                                                                                                                                                                                                                                                                                                                        | May 7, 2020 - Sep 29, 2020  | 454,968<br>(221,312)       | 42,125<br>(16,546)   |
| United States  | 328,239,523 | <a href="https://www.cdc.gov/coronavirus/2019-ncov/covid-data/covidview/07242020/clinical-labs.html">https://www.cdc.gov/coronavirus/2019-ncov/covid-data/covidview/07242020/clinical-labs.html</a> ;<br><a href="https://www.cdc.gov/coronavirus/2019-ncov/covid-data/covidview/07242020/public-health-lab.html">https://www.cdc.gov/coronavirus/2019-ncov/covid-data/covidview/07242020/public-health-lab.html</a> ;<br><a href="https://www.cdc.gov/coronavirus/2019-ncov/covid-data/covidview/07242020/commercial-labs.html">https://www.cdc.gov/coronavirus/2019-ncov/covid-data/covidview/07242020/commercial-labs.html</a> ;<br><a href="https://gis.cdc.gov/grasp/COVIDNet/COVID19_5.html">https://gis.cdc.gov/grasp/COVIDNet/COVID19_5.html</a> | Mar 1, 2020 - Dec 26, 2020  | 19,518,373<br>(11,441,526) | 345,351<br>(314,870) |

|              | Population Data Used                                                                                                                                                                                                                                        | Year Collected of<br>Population Data Used | Date of Most Recent Publicly<br>Available National Census |
|--------------|-------------------------------------------------------------------------------------------------------------------------------------------------------------------------------------------------------------------------------------------------------------|-------------------------------------------|-----------------------------------------------------------|
| Canada       | <a href="https://www150.statcan.gc.ca/t1/tbl1/en/tv.action?pid=1710000501&amp;pickMembers%5B0%5D=1.1&amp;pickMembers%5B1%5D=2.2">https://www150.statcan.gc.ca/t1/tbl1/en/tv.action?pid=1710000501&amp;pickMembers%5B0%5D=1.1&amp;pickMembers%5B1%5D=2.2</a> | 2020                                      | 2016                                                      |
| Chile        | <a href="https://population.un.org/wpp/Download/Standard/Population/">https://population.un.org/wpp/Download/Standard/Population/</a>                                                                                                                       | 2019                                      | 2017                                                      |
| Germany      | <a href="https://population.un.org/wpp/Download/Standard/Population/">https://population.un.org/wpp/Download/Standard/Population/</a>                                                                                                                       | 2019                                      | 2011                                                      |
| Italy        | <a href="https://population.un.org/wpp/Download/Standard/Population/">https://population.un.org/wpp/Download/Standard/Population/</a>                                                                                                                       | 2019                                      | 2011                                                      |
| Netherlands  | <a href="https://population.un.org/wpp/Download/Standard/Population/">https://population.un.org/wpp/Download/Standard/Population/</a>                                                                                                                       | 2019                                      | 2011                                                      |
| New Zealand  | <a href="https://population.un.org/wpp/Download/Standard/Population/">https://population.un.org/wpp/Download/Standard/Population/</a>                                                                                                                       | 2019                                      | 2018                                                      |
| Peru         | <a href="https://population.un.org/wpp/Download/Standard/Population/">https://population.un.org/wpp/Download/Standard/Population/</a>                                                                                                                       | 2019                                      | 2017                                                      |
| Portugal     | <a href="https://population.un.org/wpp/Download/Standard/Population/">https://population.un.org/wpp/Download/Standard/Population/</a>                                                                                                                       | 2019                                      | 2011                                                      |
| South Africa | <a href="https://population.un.org/wpp/Download/Standard/Population/">https://population.un.org/wpp/Download/Standard/Population/</a>                                                                                                                       | 2019                                      | 2011                                                      |
| South Korea  | <a href="https://population.un.org/wpp/Download/Standard/Population/">https://population.un.org/wpp/Download/Standard/Population/</a>                                                                                                                       | 2019                                      | 2019                                                      |
| Turkey       | <a href="https://population.un.org/wpp/Download/Standard/Population/">https://population.un.org/wpp/Download/Standard/Population/</a>                                                                                                                       | 2019                                      | 2020                                                      |
| USA          | <a href="https://population.un.org/wpp/Download/Standard/Population/">https://population.un.org/wpp/Download/Standard/Population/</a>                                                                                                                       | 2019                                      | 2020                                                      |
| UK           | <a href="https://population.un.org/wpp/Download/Standard/Population/">https://population.un.org/wpp/Download/Standard/Population/</a>                                                                                                                       | 2019                                      | 1921                                                      |

**Table S2. Summary of case data independence for 15 countries included in analyses**  
P values are indicated by \* for <0.05/n, where n is the number of age groups for that specific country

**Brazil**

|                  | 0-5 yr | 6-19 yr | 20-29 yr | 30-39 yr | 40-49 yr | 50-59 yr | 60-69 yr | 70-79 yr | 80-89 yr | 90+ yr |
|------------------|--------|---------|----------|----------|----------|----------|----------|----------|----------|--------|
| Hospitalizations | 0.56   | 0.51    | -0.26    | -0.24    | -0.06    | 0.05     | 0.33     | 0.13     | 0.25     | -0.27  |

**Canada**

|        | 0-19 yr | 20-29 yr | 30-39 yr | 40-49 yr | 50-59 yr | 60-69 yr | 70-79 yr | 80+ yr |
|--------|---------|----------|----------|----------|----------|----------|----------|--------|
| Male   | 0.93*   | 0.61*    | 0.66*    | 0.44*    | -0.35    | -0.16    | -0.16    | -0.39* |
| Female | 0.87*   | 0.17     | 0.47*    | 0.46*    | 0.00     | -0.27**  | -0.30*   | -0.25  |

**Chile**

|        | 0-9 yr | 10-19 yr | 20-29 yr | 30-39 yr | 40-49 yr | 50-59 yr | 60-69 yr | 70-79 yr | 80+ yr |
|--------|--------|----------|----------|----------|----------|----------|----------|----------|--------|
| Male   | 0.69*  | 0.86*    | -0.05    | -0.57*   | -0.70*   | -0.64*   | -0.62*   | -0.33    | -0.42  |
| Female | 0.68*  | 0.86*    | 0.35     | -0.21    | -0.13    | -0.25    | 0.42     | 0.32     | -0.34  |

**Germany**

|       | 0-4 yr | 5-14 yr | 15-34 yr | 35-59 yr | 60-79 yr | 80+ yr |
|-------|--------|---------|----------|----------|----------|--------|
| Cases | 0.09   | 0.89*   | -0.10    | -0.64*   | 0.12     | -0.22  |

**India**

|        | 0-9 yr | 10-19 yr | 20-29 yr | 30-39 yr | 40-49 yr | 50-59 yr | 60-69 yr | 70-79 yr | 80+ yr |
|--------|--------|----------|----------|----------|----------|----------|----------|----------|--------|
| Male   | 0.45   | 0.42     | 0.43     | 0.45     | 0.43     | 0.59*    | 0.29     | 0.19     | 0.01   |
| Female | 0.18   | 0.36     | -0.19    | 0.82*    | 0.75*    | 0.81*    | 0.38     | -0.06    | 0.36   |

**Italy**

|        | 0-9 yr | 10-19 yr | 20-29 yr | 30-39 yr | 40-49 yr | 50-59 yr | 60-69 yr | 70-79 yr | 80-89 yr | 90+ yr |
|--------|--------|----------|----------|----------|----------|----------|----------|----------|----------|--------|
| Male   | 0.69*  | 0.66*    | 0.38     | 0.46*    | 0.58*    | 0.58*    | 0.05     | -0.33    | -0.61*   | -0.54* |
| Female | 0.71*  | 0.72*    | 0.55*    | 0.67*    | 0.76*    | 0.49*    | 0.42     | -0.29    | -0.69*   | -0.62* |

**Netherlands**

|        | 0-9 yr | 10-19 yr | 20-29 yr | 30-39 yr | 40-49 yr | 50-59 yr | 60-69 yr | 70-79 yr | 80-89 yr | 90+ yr |
|--------|--------|----------|----------|----------|----------|----------|----------|----------|----------|--------|
| Male   | 0.36   | 0.87*    | 0.59*    | 0.67*    | 0.47*    | 0.50*    | -0.11    | -0.23    | -0.19    | -0.06  |
| Female | 0.44*  | 0.86*    | 0.49*    | 0.67*    | -0.15    | -0.15    | 0.10     | -0.20    | -0.13    |        |

|  |  |  |  |  |  |  |  |  |  |       |
|--|--|--|--|--|--|--|--|--|--|-------|
|  |  |  |  |  |  |  |  |  |  | -0.28 |
|--|--|--|--|--|--|--|--|--|--|-------|

#### New Zealand

|        | 0-9 yr | 10-19 yr | 20-29 yr | 30-39 yr | 40-49 yr | 50-59 yr | 60-69 yr | 70-79 yr | 80-89 yr | 90+ yr |
|--------|--------|----------|----------|----------|----------|----------|----------|----------|----------|--------|
| Male   | -0.03  | 0.34     | 0.33     | 0.29     | -0.14    | -0.03    | -0.18    | -0.27    | -0.34    | -0.20  |
| Female | 0.30   | -0.01    | 0.20     | -0.08    | -0.22    | -0.11    | -0.29    | -0.15    | -0.25    | -0.25  |

#### Peru

|        | 0-9 yr | 10-19 yr | 20-29 yr | 30-39 yr | 40-49 yr | 50-59 yr | 60-69 yr | 70-79 yr | 80+ yr |
|--------|--------|----------|----------|----------|----------|----------|----------|----------|--------|
| Male   | 0.21   | 0.81*    | -0.42*   | 0.15     | -0.77*   | -0.75*   | -0.32    | -0.31    | 0.13   |
| Female | 0.77*  | 0.59*    | 0.57*    | 0.62*    | 0.41     | 0.26     | -0.10    | -0.09    | 0.62*  |

#### Portugal

|        | 0-9 yr | 10-19 yr | 20-29 yr | 30-39 yr | 40-49 yr | 50-59 yr | 60-69 yr | 70-79 yr | 80+ yr |
|--------|--------|----------|----------|----------|----------|----------|----------|----------|--------|
| Male   | 0.85*  | 0.92*    | 0.59     | 0.48     | 0.36     | -0.05    | -0.33    | -0.41    | -0.75* |
| Female | 0.91*  | 0.91*    | 0.59     | 0.37     | -0.46    | -0.86*   | -0.55    | -0.51    | -0.72* |

#### South Africa

|       | 0-9 yr | 10-19 yr | 20-29 yr | 30-39 yr | 40-49 yr | 50-59 yr | 60-69 yr | 70-79 yr | 80+ yr |
|-------|--------|----------|----------|----------|----------|----------|----------|----------|--------|
| Cases | -0.26  | 0.53*    | -0.24    | -0.77*   | -0.68*   | 0.23     | 0.83*    | 0.75*    | -0.16  |

#### South Korea

|        | 0-9 yr | 10-19 yr | 20-29 yr | 30-39 yr | 40-49 yr | 50-59 yr | 60-69 yr | 70-79 yr | 80+ yr |
|--------|--------|----------|----------|----------|----------|----------|----------|----------|--------|
| Male   | 0.47   | -0.32    | -0.28    | 0.49     | 0.61     | 0.67*    | 0.51     | 0.11     | -0.26  |
| Female | 0.19   | -0.42    | -0.78*   | -0.56    | -0.38    | 0.33     | 0.40     | 0.46     | -0.02  |

#### Turkey

|       | 0-14 yr | 15-24 yr | 25-49 yr | 50-64 yr | 65-79 yr | 80+ yr |
|-------|---------|----------|----------|----------|----------|--------|
| Cases | -0.725* | 0.40     | 0.30     | 0.60     | -0.15    | -0.19  |

#### United Kingdom

|        | 0-4 yr | 5-9 yr | 10-19 yr | 20-29 yr | 30-39 yr | 40-49 yr | 50-59 yr | 60-69 yr | 70-79 yr | 80+ yr |
|--------|--------|--------|----------|----------|----------|----------|----------|----------|----------|--------|
| Male   | 0.79*  | 0.84*  | 0.97*    | 0.93*    | 0.79*    | 0.69*    | 0.53     | -0.43    | -0.81*   | -0.88* |
| Female | 0.75*  | 0.73*  | 0.97*    | 0.89*    | 0.71*    | 0.30     | -0.08    | -0.51    | -0.87*   | -0.90* |

#### United States

|        | 0-9 yr | 10-19 yr | 20-29 yr | 30-39 yr | 40-49 yr | 50-59 yr | 60-69 yr | 70-79 yr | 80-89 yr |
|--------|--------|----------|----------|----------|----------|----------|----------|----------|----------|
| Male   | 0.86*  | 0.83*    | 0.53*    | -0.26    | -0.62*   | -0.67*   | -0.60*   | -0.56*   | -0.67*   |
| Female | 0.86*  | 0.80*    | 0.54*    | 0.38     | 0.12     | -0.51*   | -0.39    | -0.39    | -0.53*   |

**Table S3. Tukey's post-hoc tests of pairwise age-group comparisons in COVID-19 case proportions within each of 13 countries.**  
Values in Table are Q-stat. P values are indicated by \* for <0.05, \*\* for <0.01, \*\*\* for <0.001, and \*\*\*\* for <0.0001.

Italy

|          | 0-9 yr    | 10-19 yr  | 20-29 yr  | 30-39 yr  | 40-49 yr  | 50-59 yr  | 60-69 yr  | 70-79 yr  | 80-89 yr  |
|----------|-----------|-----------|-----------|-----------|-----------|-----------|-----------|-----------|-----------|
| 10-19 yr | 4.31****  |           |           |           |           |           |           |           |           |
| 20-29 yr | 11.70**** | 7.39****  |           |           |           |           |           |           |           |
| 30-39 yr | 8.49****  | 4.19      | 3.21      |           |           |           |           |           |           |
| 40-49 yr | 6.95****  | 2.64      | 4.76*     | 1.55      |           |           |           |           |           |
| 50-59 yr | 7.15*     | 2.84      | 4.55*     | 1.35      | 0.22      |           |           |           |           |
| 60-69 yr | 4.69*     | 0.38      | 7.01****  | 3.81      | 2.26      | 2.46      |           |           |           |
| 70-79 yr | 4.56****  | 0.25      | 7.15****  | 3.94      | 2.39      | 2.59      | 0.13      |           |           |
| 80-89 yr | 10.58**** | 6.27***   | 1.121     | 2.09      | 3.64      | 3.44      | 5.90**    | 6.03***   |           |
| 90+ yr   | 23.29**** | 18.98**** | 11.58**** | 14.79**** | 16.34**** | 16.14**** | 19.60**** | 18.73**** | 12.70**** |

UK

|          | 0-4 yr    | 5-9 yr    | 10-19 yr  | 20-29 yr   | 30-39 yr | 40-49 yr | 50-59 yr  | 60-69 yr  | 70-79 yr  |
|----------|-----------|-----------|-----------|------------|----------|----------|-----------|-----------|-----------|
| 5-9 yr   | 0.01      |           |           |            |          |          |           |           |           |
| 10-19 yr | 4.70*     | 4.69*     |           |            |          |          |           |           |           |
| 20-29 yr | 14.21**** | 14.20**** | 9.51****  |            |          |          |           |           |           |
| 30-39 yr | 10.45**** | 10.45**** | 5.75**    | 3.755      |          |          |           |           |           |
| 40-49 yr | 8.92****  | 8.91****  | 4.22      | 5.287**    | 1.53     |          |           |           |           |
| 50-59 yr | 7.10****  | 7.09****  | 2.40      | 7.113****  | 3.36     | 1.83     |           |           |           |
| 60-69 yr | 4.11      | 4.11      | 0.59      | 10.095**** | 6.34***  | 4.81*    | 2.98      |           |           |
| 70-79 yr | 3.25      | 3.24      | 1.45      | 10.961**** | 7.21**** | 5.67**   | 3.85      | 0.87      |           |
| 80+ yr   | 18.72**** | 18.71**** | 14.02**** | 4.512****  | 8.27**** | 9.8****  | 11.63**** | 14.61**** | 15.47**** |

South Korea

|  | 0-9 yr | 10-19 yr | 20-29 yr | 30-39 yr | 40-49 yr | 50-59 yr | 60-69 yr | 70-79 yr |
|--|--------|----------|----------|----------|----------|----------|----------|----------|
|--|--------|----------|----------|----------|----------|----------|----------|----------|

|          |           |           |           |       |      |      |      |      |
|----------|-----------|-----------|-----------|-------|------|------|------|------|
| 10-19 yr | 4.33      |           |           |       |      |      |      |      |
| 20-29 yr | 15.06**** | 10.73**** |           |       |      |      |      |      |
| 30-39 yr | 9.13****  | 4.8*      | 5.92**    |       |      |      |      |      |
| 40-49 yr | 5.2**     | 0.87      | 9.86****  | 3.94  |      |      |      |      |
| 50-59 yr | 5.16**    | 0.83      | 9.89****  | 3.97  | 0.03 |      |      |      |
| 60-69 yr | 6.54***   | 2.21      | 8.51****  | 2.59  | 1.35 | 1.38 |      |      |
| 70-79 yr | 4.87*     | 0.54      | 10.18**** | 4.26  | 0.32 | 0.29 | 1.67 |      |
| 80+ yr   | 4.7*      | 0.37      | 10.36**** | 4.44* | 0.5  | 0.46 | 1.85 | 0.17 |

#### Canada

|          | 0-19 yr | 20-29 yr | 30-39 yr | 40-49 yr | 50-59 yr | 60-69 yr | 70-79 yr |
|----------|---------|----------|----------|----------|----------|----------|----------|
| 20-29 yr | 5.97*** |          |          |          |          |          |          |
| 30-39 yr | 3.02    | 2.95     |          |          |          |          |          |
| 40-49 yr | 2.05    | 3.93     | 0.97     |          |          |          |          |
| 50-59 yr | 4.85*   | 1.13     | 1.83     | 2.8      |          |          |          |
| 60-69 yr | 1.42    | 4.55*    | 1.6      | 0.62     | 3.42     |          |          |
| 70-79 yr | 2.17    | 8.14**** | 5.18**   | 4.21     | 7.01**** | 3.59     |          |
| 80+ yr   | 0.43    | 5.54**   | 2.59     | 1.62     | 4.42*    | 0.99     | 2.59     |

#### USA

|          | 0-9 yr    | 10-19 yr  | 20-29 yr  | 30-39 yr  | 40-49 yr  | 50-59 yr  | 60-69 yr | 70-79 yr |
|----------|-----------|-----------|-----------|-----------|-----------|-----------|----------|----------|
| 10-19 yr | 17.04**** |           |           |           |           |           |          |          |
| 20-29 yr | 41.71**** | 24.67**** |           |           |           |           |          |          |
| 30-39 yr | 37.21**** | 20.17**** | 4.5*      |           |           |           |          |          |
| 40-49 yr | 39.03**** | 22****    | 2.67      | 1.83      |           |           |          |          |
| 50-59 yr | 36.29**** | 19.25**** | 5.42**    | 0.92      | 2.75      |           |          |          |
| 60-69 yr | 26.25**** | 9.21****  | 15.46**** | 10.95**** | 12.78**** | 10.03**** |          |          |
| 70-79 yr | 22.66**** | 5.62**    | 19.05**** | 14.55**** | 16.38**** | 13.63**** | 3.6      |          |



|        |           |          |      |      |      |      |           |           |
|--------|-----------|----------|------|------|------|------|-----------|-----------|
| 80+ yr | 37.74**** | 20.7**** | 3.97 | 0.53 | 1.29 | 1.45 | 11.49**** | 15.08**** |
|--------|-----------|----------|------|------|------|------|-----------|-----------|

#### Germany

|          | 0-4 yr | 5-14 yr | 15-34 yr | 35-59 yr | 60-79 yr |
|----------|--------|---------|----------|----------|----------|
| 5-14 yr  | 2.39   |         |          |          |          |
| 15-34 yr | 3.14   | 5.53**  |          |          |          |
| 35-59 yr | 1.13   | 1.26    | 4.26*    |          |          |
| 60-79 yr | 4.9**  | 2.51    | 8.04**** | 3.77     |          |
| 80+ yr   | 0.81   | 3.2     | 2.33     | 1.94     | 5.71***  |

#### South Africa

|          | 0-9 yr    | 10-19 yr  | 20-29 yr  | 30-39 yr  | 40-49 yr  | 50-59 yr  | 60-69 yr | 70-79 yr  |
|----------|-----------|-----------|-----------|-----------|-----------|-----------|----------|-----------|
| 10-19 yr | 6.46***   |           |           |           |           |           |          |           |
| 20-29 yr | 20.48**** | 14.01**** |           |           |           |           |          |           |
| 30-39 yr | 32.63**** | 26.17**** | 12.15**** |           |           |           |          |           |
| 40-49 yr | 42.43**** | 35.97**** | 21.95**** | 9.80****  |           |           |          |           |
| 50-59 yr | 46.24**** | 39.78**** | 25.77**** | 13.61**** | 3.81      |           |          |           |
| 60-69 yr | 34.93**** | 28.47**** | 14.46**** | 2.3       | 7.5****   | 11.31**** |          |           |
| 70-79 yr | 31.9****2 | 25.46**** | 11.45**** | 0.71      | 10.51**** | 14.32**** | 3.01     |           |
| 80+ yr   | 44.89**** | 38.43**** | 24.42**** | 12.26**** | 2.46      | 1.35      | 9.96**** | 12.97**** |

#### Portugal

|          | 0-9 yr    | 10-19 yr  | 20-29 yr  | 30-39 yr  | 40-49 yr | 50-59 yr | 60-69 yr | 70-79 yr |
|----------|-----------|-----------|-----------|-----------|----------|----------|----------|----------|
| 10-19 yr | 0.01      |           |           |           |          |          |          |          |
| 20-29 yr | 20.44**** | 20.43**** |           |           |          |          |          |          |
| 30-39 yr | 17.30**** | 17.29**** | 3.15      |           |          |          |          |          |
| 40-49 yr | 9.95****  | 9.94****  | 10.49**** | 7.35****  |          |          |          |          |
| 50-59 yr | 8.55****  | 8.54****  | 11.89**** | 8.75****  | 1.40     |          |          |          |
| 60-69 yr | 3.55      | 3.54      | 16.89**** | 13.74**** | 6.40***  | 5.00*    |          |          |
| 70-79 yr | 1.66      | 1.65      | 18.79**** | 15.64**** | 8.29**** | 6.89**** | 1.90     |          |

|        |           |           |      |      |          |          |           |           |
|--------|-----------|-----------|------|------|----------|----------|-----------|-----------|
| 80+ yr | 17.10**** | 17.09**** | 3.34 | 0.19 | 7.15**** | 8.55**** | 13.55**** | 15.44**** |
|--------|-----------|-----------|------|------|----------|----------|-----------|-----------|

#### Chile

|          | 0-9 yr    | 10-19 yr  | 20-29 yr  | 30-39 yr  | 40-49 yr  | 50-59 yr  | 60-69 yr  | 70-79 yr  |
|----------|-----------|-----------|-----------|-----------|-----------|-----------|-----------|-----------|
| 10-19 yr | 17.26**** |           |           |           |           |           |           |           |
| 20-29 yr | 79.38**** | 62.12**** |           |           |           |           |           |           |
| 30-39 yr | 82.49**** | 65.24**** | 3.12      |           |           |           |           |           |
| 40-49 yr | 69.16**** | 51.90**** | 10.22**** | 13.33**** |           |           |           |           |
| 50-59 yr | 60.56**** | 43.31**** | 18.81**** | 21.93**** | 8.60****  |           |           |           |
| 60-69 yr | 49.32**** | 32.06**** | 30.05**** | 33.17**** | 19.84**** | 11.24**** |           |           |
| 70-79 yr | 43.34**** | 26.09**** | 36.03**** | 39.15**** | 25.82**** | 17.22**** | 5.98***   |           |
| 80+ yr   | 68.27**** | 51.01**** | 11.11**** | 14.23**** | 0.89      | 7.70****  | 18.94**** | 24.92**** |

#### Turkey

|          | 0-14 yr   | 15-24 yr  | 25-49 yr  | 50-64 yr | 65-79 yr |
|----------|-----------|-----------|-----------|----------|----------|
| 15-24 yr | 52.95**** |           |           |          |          |
| 25-49 yr | 87.36**** | 34.41**** |           |          |          |
| 50-64 yr | 82.31**** | 29.36**** | 5.05**    |          |          |
| 65-79 yr | 79.80**** | 26.85**** | 7.56****  | 2.51     |          |
| 80+ yr   | 75.84**** | 22.89**** | 11.52**** | 6.47**** | 3.96     |

#### Peru

|          | 0-9 yr    | 10-19 yr  | 20-29 yr  | 30-39 yr | 40-49 yr | 50-59 yr | 60-69 yr | 70-79 yr |
|----------|-----------|-----------|-----------|----------|----------|----------|----------|----------|
| 10-19 yr | 3.98      |           |           |          |          |          |          |          |
| 20-29 yr | 26.30**** | 22.32**** |           |          |          |          |          |          |
| 30-39 yr | 28.57**** | 24.59**** | 2.28      |          |          |          |          |          |
| 40-49 yr | 33.05**** | 29.07**** | 6.76****  | 4.48*    |          |          |          |          |
| 50-59 yr | 36.35**** | 32.37**** | 10.05**** | 7.77**** | 3.29     |          |          |          |
| 60-69 yr | 34.51     | 30.53     | 8.22****  | 5.94***  | 1.46     | 1.83     |          |          |

|          |               |               |          |         |      |       |      |      |
|----------|---------------|---------------|----------|---------|------|-------|------|------|
|          | ****          | ****          |          |         |      |       |      |      |
| 70-79 yr | 34.95<br>**** | 30.97<br>**** | 8.65**** | 6.37*** | 1.89 | 1.400 | 0.43 |      |
| 80+ yr   | 35.03<br>**** | 31.05<br>**** | 8.73**** | 6.46*** | 1.97 | 1.32  | 0.51 | 0.08 |

#### New Zealand

|          |               |               |               |               |          |          |          |          |          |
|----------|---------------|---------------|---------------|---------------|----------|----------|----------|----------|----------|
|          | 0-9 yr        | 10-19 yr      | 20-29 yr      | 30-39 yr      | 40-49 yr | 50-59 yr | 60-69 yr | 70-79 yr | 80-89 yr |
| 10-19 yr | 1.17          |               |               |               |          |          |          |          |          |
| 20-29 yr | 11.56<br>**** | 10.39*<br>*** |               |               |          |          |          |          |          |
| 30-39 yr | 10.28<br>***  | 9.11****      | 1.28          |               |          |          |          |          |          |
| 40-49 yr | 1.15          | 0.02          | 10.41<br>**** | 9.13****      |          |          |          |          |          |
| 50-59 yr | 0.34          | 0.83          | 11.21<br>***  | 9.94****      | 0.81     |          |          |          |          |
| 60-69 yr | 1.08          | 2.25          | 12.63<br>**** | 11.36****     | 2.23     | 1.42     |          |          |          |
| 70-79 yr | 3.01          | 4.18          | 14.57<br>**** | 13.29****     | 4.16     | 3.35     | 1.93     |          |          |
| 80-89 yr | 3.80          | 4.97*         | 15.35<br>**** | 14.08<br>**** | 4.95*    | 4.14     | 2.72     | 0.79     |          |
| 90+ yr   | 3.91          | 5.08*         | 15.47<br>**** | 14.19<br>**** | 5.06*    | 4.25     | 2/83     | 0.90     | 0.11     |

#### Netherlands

|          |               |          |          |          |          |          |          |          |          |
|----------|---------------|----------|----------|----------|----------|----------|----------|----------|----------|
|          | 0-9 yr        | 10-19 yr | 20-29 yr | 30-39 yr | 40-49 yr | 50-59 yr | 60-69 yr | 70-79 yr | 80-89 yr |
| 10-19 yr | 5.61**        |          |          |          |          |          |          |          |          |
| 20-29 yr | 11.27<br>**** | 5.66**   |          |          |          |          |          |          |          |
| 30-39 yr | 7.77<br>****  | 2.16     | 3.50     |          |          |          |          |          |          |
| 40-49 yr | 9.86<br>****  | 4.26     | 1.40     | 2.10     |          |          |          |          |          |
| 50-59 yr | 9.50<br>****  | 3.89     | 1.77     | 1.74     | 0.36     |          |          |          |          |

|          |               |          |             |         |       |       |          |          |          |
|----------|---------------|----------|-------------|---------|-------|-------|----------|----------|----------|
| 60-69 yr | 6.01***       | 0.40     | 5.26**      | 1.76    | 3.86  | 3.50  |          |          |          |
| 70-79 yr | 4.99*         | 0.61     | 6.28*<br>** | 2.77    | 4.87* | 4.51* | 1.01     |          |          |
| 80-89 yr | 7.19****      | 1.59     | 4.07        | 0.57    | 2.67  | 2.31  | 1.19     | 2.20     |          |
| 90+ yr   | 13.98<br>**** | 8.37**** | 2.71        | 6.21*** | 4.11  | 4.47  | 7.97**** | 8.98**** | 6.78**** |

**Table S4. Tukey's post-hoc tests of pairwise age-group comparisons in COVID-19 hospitalization proportions within each of three countries.** Values in Table are Q-stat. P values are indicated by \* for <0.05, \*\* for <0.01, \*\*\* for <0.001, and \*\*\*\* for <0.0001.

India

|          | 0-9 yr   | 10-19 yr | 20-29 yr | 30-39 yr | 40-49 yr | 50-59 yr | 60-69 yr | 70-79 yr |
|----------|----------|----------|----------|----------|----------|----------|----------|----------|
| 10-19 yr | 1.21     |          |          |          |          |          |          |          |
| 20-29 yr | 9.65**** | 8.44**** |          |          |          |          |          |          |
| 30-39 yr | 8.33**** | 7.12**** | 1.32     |          |          |          |          |          |
| 40-49 yr | 8.13**** | 6.92**** | 1.52     | 0.20     |          |          |          |          |
| 50-59 yr | 9.32**** | 8.11**** | 0.33     | 0.99     | 1.19     |          |          |          |
| 60-69 yr | 8.20**** | 6.99**** | 1.45     | 0.13     | 0.07     | 1.12     |          |          |
| 70-79 yr | 5.87**   | 4.65*    | 3.79     | 2.47     | 2.27     | 3.46     | 2.34     |          |
| 80+ yr   | 4.96*    | 3.74     | 4.70*    | 3.38     | 3.17     | 4.36     | 3.25     | 0.91     |

Chile

|          | 0-4 yr     | 5-17 yr    | 18-49 yr   | 50-59 yr  | 60-69 yr  | 70-79 yr  |
|----------|------------|------------|------------|-----------|-----------|-----------|
| 5-17 yr  | 7.05****   |            |            |           |           |           |
| 18-49 yr | 1.93       | 8.98****   |            |           |           |           |
| 50-59 yr | 22.70****  | 15.64****  | 24.62****  |           |           |           |
| 60-69 yr | 41.13****  | 34.07****  | 43.05****  | 18.43**** |           |           |
| 70-79 yr | 65.35****  | 58.30****  | 67.28****  | 42.66**** | 24.22**** |           |
| 80+ yr   | 109.95**** | 102.89**** | 111.87**** | 87.25**** | 68.82**** | 44.59**** |

Brazil

|          | 0-5 yr     | 6-19 yr    | 20-29 yr   | 30-39 yr  | 40-49 yr  | 50-59 yr  | 60-69 yr  | 70-79 yr | 80-89 yr |
|----------|------------|------------|------------|-----------|-----------|-----------|-----------|----------|----------|
| 6-19 yr  | 2.97       |            |            |           |           |           |           |          |          |
| 20-29 yr | 1.05       | 4.02       |            |           |           |           |           |          |          |
| 30-39 yr | 9.08****   | 12.05****  | 8.03****   |           |           |           |           |          |          |
| 40-49 yr | 18.60****  | 21.57****  | 17.55****  | 9.52****  |           |           |           |          |          |
| 50-59 yr | 33.11****  | 36.08****  | 32.06****  | 24.03**** | 14.51**** |           |           |          |          |
| 60-69 yr | 59.61****  | 62.58****  | 58.57****  | 50.53**** | 41.01**** | 26.50**** |           |          |          |
| 70-79 yr | 106.90**** | 109.87**** | 105.85**** | 97.81**** | 88.29**** | 73.79**** | 47.28**** |          |          |

|          |            |                |                |                |                |                |                |                |            |
|----------|------------|----------------|----------------|----------------|----------------|----------------|----------------|----------------|------------|
| 80-89 yr | 190.87**** | 193.84<br>**** | 189.82<br>**** | 181.79<br>**** | 172.27<br>**** | 157.76<br>**** | 131.26<br>**** | 83.97<br>****  |            |
| 90+ yr   | 300.77**** | 303.74<br>**** | 299.72<br>**** | 291.69<br>**** | 282.17<br>**** | 267.66<br>**** | 241.15<br>**** | 193.87<br>**** | 109.90**** |

**Table S5. Tukey's post-hoc tests of pairwise age-group comparisons in COVID-19 death proportions within each of 13 countries.**  
Values in Table are Q-stat. P values are indicated by \* for <0.05, \*\* for <0.01, \*\*\* for <0.001, and \*\*\*\* for <0.0001.

Italy

|          | 0-9 yr        | 10-19 yr      | 20-29 yr      | 30-39 yr      | 40-49 yr      | 50-59 yr      | 60-69 yr      | 70-79 yr      | 80-89 yr  |
|----------|---------------|---------------|---------------|---------------|---------------|---------------|---------------|---------------|-----------|
| 10-19 yr | 0.00          |               |               |               |               |               |               |               |           |
| 20-29 yr | 0.02          | 0.02          |               |               |               |               |               |               |           |
| 30-39 yr | 0.08          | 0.08          | 0.06          |               |               |               |               |               |           |
| 40-49 yr | 0.34          | 0.34          | 0.32          | 0.26          |               |               |               |               |           |
| 50-59 yr | 0.99          | 0.99          | 0.97          | 0.90          | 0.65          |               |               |               |           |
| 60-69 yr | 3.24          | 3.25          | 3.22          | 3.16          | 2.91          | 2.26          |               |               |           |
| 70-79 yr | 10.55****     | 10.56****     | 10.54****     | 10.47****     | 10.22****     | 9.57****      | 7.31****      |               |           |
| 80-89 yr | 31.42<br>**** | 31.42<br>**** | 31.40<br>**** | 31.33<br>**** | 31.08<br>**** | 30.43<br>**** | 28.17<br>**** | 20.86<br>**** |           |
| 90+ yr   | 77.62<br>**** | 77.63<br>**** | 77.60<br>**** | 77.54<br>**** | 77.29<br>**** | 76.64<br>**** | 74.38<br>**** | 67.07<br>**** | 46.21**** |

UK

|          | 0-4 yr         | 5-9 yr         | 10-19 yr       | 20-29 yr       | 30-39 yr       | 40-49 yr       | 50-59 yr       | 60-69 yr       | 70-79 yr   |
|----------|----------------|----------------|----------------|----------------|----------------|----------------|----------------|----------------|------------|
| 5-9 yr   | 0.13           |                |                |                |                |                |                |                |            |
| 10-19 yr | 0.11           | 0.02           |                |                |                |                |                |                |            |
| 20-29 yr | 0.01           | 0.14           | 0.11           |                |                |                |                |                |            |
| 30-39 yr | 0.29           | 0.42           | 0.40           | 0.29           |                |                |                |                |            |
| 40-49 yr | 1.74           | 1.87           | 1.85           | 1.73           | 1.45           |                |                |                |            |
| 50-59 yr | 4.81*          | 4.94*          | 4.92*          | 4.81*          | 4.52*          | 3.07           |                |                |            |
| 60-69 yr | 14.49****      | 14.62****      | 14.60****      | 14.48****      | 14.20****      | 12.75****      | 9.68****       |                |            |
| 70-79 yr | 40.94****      | 41.07****      | 41.05****      | 40.93****      | 40.65****      | 39.20****      | 36.13****      | 26.45****      |            |
| 80+ yr   | 201.85<br>**** | 201.97<br>**** | 201.95<br>**** | 201.84<br>**** | 201.55<br>**** | 200.11<br>**** | 197.03<br>**** | 187.35<br>**** | 160.90**** |

South Korea

|          | 0-9 yr | 10-19 yr | 20-29 yr | 30-39 yr | 40-49 yr | 50-59 yr | 60-69 yr | 70-79 yr |
|----------|--------|----------|----------|----------|----------|----------|----------|----------|
| 10-19 yr | 0.00   |          |          |          |          |          |          |          |
| 20-29 yr | 0.00   | 0.00     |          |          |          |          |          |          |

|          |           |           |           |           |           |           |           |           |
|----------|-----------|-----------|-----------|-----------|-----------|-----------|-----------|-----------|
| 30-39 yr | 0.03      | 0.03      | 0.03      |           |           |           |           |           |
| 40-49 yr | 0.11      | 0.11      | 0.11      | 0.08      |           |           |           |           |
| 50-59 yr | 0.17      | 0.17      | 0.17      | 0.14      | 0.06      |           |           |           |
| 60-69 yr | 1.74      | 1.74      | 1.74      | 1.70      | 1.62      | 1.56      |           |           |
| 70-79 yr | 6.71***   | 6.71***   | 6.71***   | 6.67***   | 6.59***   | 6.53***   | 4.97*     |           |
| 80+ yr   | 20.21**** | 20.21**** | 20.21**** | 20.18**** | 20.10**** | 20.04**** | 18.48**** | 13.51**** |

#### Canada

|          | 0-19 yr   | 20-29 yr  | 30-39 yr  | 40-49 yr  | 50-59 yr  | 60-69 yr  | 70-79 yr  |
|----------|-----------|-----------|-----------|-----------|-----------|-----------|-----------|
| 20-29 yr | 0.04      |           |           |           |           |           |           |
| 30-39 yr | 0.13      | 0.10      |           |           |           |           |           |
| 40-49 yr | 0.56      | 0.52      | 0.42      |           |           |           |           |
| 50-59 yr | 2.06      | 2.02      | 1.93      | 1.50      |           |           |           |
| 60-69 yr | 4.28      | 4.24      | 4.15      | 3.72      | 2.22      |           |           |
| 70-79 yr | 12.42**** | 12.39**** | 12.29**** | 11.87**** | 10.37**** | 8.14****  |           |
| 80+ yr   | 27.58**** | 27.55**** | 27.45**** | 27.02**** | 25.52**** | 23.30**** | 15.16**** |

#### USA

|          | 0-4 yr     | 5-14 yr    | 15-24 yr   | 25-34 yr   | 35-44 yr   | 45-54 yr   | 55-64 yr   | 65-74 yr   | 75-84 yr   |
|----------|------------|------------|------------|------------|------------|------------|------------|------------|------------|
| 5-14 yr  | 0.05       |            |            |            |            |            |            |            |            |
| 15-24 yr | 0.15       | 0.20       |            |            |            |            |            |            |            |
| 25-34 yr | 0.87       | 0.91       | 0.71       |            |            |            |            |            |            |
| 35-44 yr | 2.48       | 2.52       | 2.32       | 1.61       |            |            |            |            |            |
| 45-54 yr | 6.96****   | 7.01****   | 6.81****   | 6.10***    | 4.49*      |            |            |            |            |
| 55-64 yr | 16.18****  | 16.23****  | 16.03****  | 15.32****  | 13.71****  | 9.22****   |            |            |            |
| 65-74 yr | 38.06****  | 38.11****  | 37.91****  | 37.20****  | 35.59****  | 31.10****  | 21.88****  |            |            |
| 75-84 yr | 94.65****  | 94.70****  | 94.50****  | 93.79****  | 92.18****  | 87.69****  | 78.47****  | 56.59****  |            |
| 85+ yr   | 266.58**** | 266.63**** | 266.43**** | 265.72**** | 264.11**** | 259.62**** | 250.40**** | 228.52**** | 171.93**** |

#### India



|          | 0-9 yr    | 10-19 yr  | 20-29 yr  | 30-39 yr  | 40-49 yr  | 50-59 yr  | 60-69 yr | 70-79 yr |
|----------|-----------|-----------|-----------|-----------|-----------|-----------|----------|----------|
| 10-19 yr | 0.03      |           |           |           |           |           |          |          |
| 20-29 yr | 0.23      | 0.26      |           |           |           |           |          |          |
| 30-39 yr | 0.84      | 0.88      | 0.62      |           |           |           |          |          |
| 40-49 yr | 2.91      | 2.95      | 2.69      | 2.07      |           |           |          |          |
| 50-59 yr | 7.67****  | 7.70****  | 7.44****  | 6.82****  | 4.75*     |           |          |          |
| 60-69 yr | 15.84**** | 15.87**** | 15.61**** | 14.99**** | 12.92**** | 8.17****  |          |          |
| 70-79 yr | 23.12**** | 23.16**** | 22.90**** | 22.28**** | 20.21**** | 15.46**** | 7.29**** |          |
| 80+ yr   | 24.17**** | 24.20**** | 23.94**** | 23.32**** | 21.25**** | 16.50**** | 8.33**** | 1.04     |

#### Germany

|          | 0-4 yr    | 5-14 yr   | 15-34 yr  | 35-59 yr  | 60-79 yr  |
|----------|-----------|-----------|-----------|-----------|-----------|
| 5-14 yr  | 0.02      |           |           |           |           |
| 15-34 yr | 0.00      | 0.02      |           |           |           |
| 35-59 yr | 0.75      | 0.77      | 0.75      |           |           |
| 60-79 yr | 6.86****  | 6.88****  | 6.86****  | 6.11***   |           |
| 80+ yr   | 48.70**** | 48.72**** | 48.70**** | 47.95**** | 41.84**** |

#### South Africa

|          | 0-9 yr    | 10-19 yr  | 20-29 yr  | 30-39 yr  | 40-49 yr  | 50-59 yr  | 60-69 yr  | 70-79 yr  |
|----------|-----------|-----------|-----------|-----------|-----------|-----------|-----------|-----------|
| 10-19 yr | 0.03      |           |           |           |           |           |           |           |
| 20-29 yr | 0.50      | 0.47      |           |           |           |           |           |           |
| 30-39 yr | 1.94      | 1.92      | 1.44      |           |           |           |           |           |
| 40-49 yr | 6.56***   | 6.53***   | 6.05***   | 4.61*     |           |           |           |           |
| 50-59 yr | 18.11**** | 18.08**** | 17.61**** | 16.17**** | 11.56**** |           |           |           |
| 60-69 yr | 32.80**** | 32.77**** | 32.30**** | 30.85**** | 26.24**** | 14.69**** |           |           |
| 70-79 yr | 47.65**** | 47.62**** | 47.15**** | 45.70**** | 41.09**** | 29.53**** | 14.85**** |           |
| 80+ yr   | 72.60**** | 72.57**** | 72.10**** | 70.65**** | 66.04**** | 54.49**** | 39.80**** | 24.95**** |

#### Portugal

|          | 0-9 yr | 10-19 yr | 20-29 yr | 30-39 yr | 40-49 yr | 50-59 yr | 60-69 yr | 70-79 yr |
|----------|--------|----------|----------|----------|----------|----------|----------|----------|
| 10-19 yr | 0.00   |          |          |          |          |          |          |          |

|          |           |           |           |           |           |           |           |           |
|----------|-----------|-----------|-----------|-----------|-----------|-----------|-----------|-----------|
| 20-29 yr | 0.07      | 0.07      |           |           |           |           |           |           |
| 30-39 yr | 0.41      | 0.41      | 0.34      |           |           |           |           |           |
| 40-49 yr | 0.51      | 0.51      | 0.44      | 0.10      |           |           |           |           |
| 50-59 yr | 1.73      | 1.73      | 1.66      | 1.32      | 1.22      |           |           |           |
| 60-69 yr | 6.28***   | 6.28***   | 6.21***   | 5.87**    | 5.77**    | 4.55*     |           |           |
| 70-79 yr | 17.62**** | 17.62**** | 17.55**** | 17.21**** | 17.10**** | 15.88**** | 11.34**** |           |
| 80+ yr   | 81.23**** | 81.23**** | 81.16**** | 80.82**** | 80.72**** | 79.49**** | 74.95**** | 63.61**** |

Peru

|          | 0-9 yr    | 10-19 yr  | 20-29 yr  | 30-39 yr  | 40-49 yr  | 50-59 yr  | 60-69 yr  | 70-79 yr  |
|----------|-----------|-----------|-----------|-----------|-----------|-----------|-----------|-----------|
| 10-19 yr | 0.07      |           |           |           |           |           |           |           |
| 20-29 yr | 0.38      | 0.31      |           |           |           |           |           |           |
| 30-39 yr | 1.16      | 1.09      | 0.78      |           |           |           |           |           |
| 40-49 yr | 3.82      | 3.75      | 3.44      | 2.66      |           |           |           |           |
| 50-59 yr | 10.47**** | 10.40**** | 10.09**** | 9.31****  | 6.65***   |           |           |           |
| 60-69 yr | 24.63**** | 24.55**** | 24.25**** | 23.46**** | 20.80**** | 14.16**** |           |           |
| 70-79 yr | 41.56**** | 41.49**** | 41.19**** | 40.40**** | 37.74**** | 31.09**** | 16.94**** |           |
| 80+ yr   | 72.96**** | 72.89**** | 72.58**** | 71.80**** | 69.14**** | 62.49**** | 48.33**** | 31.39**** |

Brazil

|          | 0-5 yr     | 6-19 yr    | 20-29 yr   | 30-39 yr   | 40-49 yr   | 50-59 yr   | 60-69 yr   | 70-79 yr  | 80-89 yr   |
|----------|------------|------------|------------|------------|------------|------------|------------|-----------|------------|
| 6-19 yr  | 0.23       |            |            |            |            |            |            |           |            |
| 20-29 yr | 0.31       | 0.55       |            |            |            |            |            |           |            |
| 30-39 yr | 1.60       | 1.83       | 1.28       |            |            |            |            |           |            |
| 40-49 yr | 4.72*      | 4.95*      | 4.41       | 3.13       |            |            |            |           |            |
| 50-59 yr | 11.77****  | 12.01****  | 11.46****  | 10.18****  | 7.05****   |            |            |           |            |
| 60-69 yr | 31.37****  | 31.60****  | 31.05****  | 29.77****  | 26.64****  | 19.59****  |            |           |            |
| 70-79 yr | 71.77****  | 72.00****  | 71.45****  | 70.17****  | 67.04****  | 59.99****  | 40.40****  |           |            |
| 80-89 yr | 155.12**** | 155.35**** | 154.81**** | 153.52**** | 150.40**** | 143.35**** | 123.75**** | 83.35**** |            |
| 90+ yr   | 273.46     | 273.69     | 273.15     | 271.86     | 268.74     | 261.68     | 242.09     | 201.69    | 118.34**** |

|  |      |      |      |      |      |      |      |      |  |
|--|------|------|------|------|------|------|------|------|--|
|  | **** | **** | **** | **** | **** | **** | **** | **** |  |
|--|------|------|------|------|------|------|------|------|--|

Turkey

|          | 0-14 yr    | 15-24 yr   | 25-49 yr   | 50-64 yr   | 65-79 yr  |
|----------|------------|------------|------------|------------|-----------|
| 15-24 yr | 0.06       |            |            |            |           |
| 25-49 yr | 0.92       | 0.85       |            |            |           |
| 50-64 yr | 10.39****  | 10.33****  | 9.48****   |            |           |
| 65-79 yr | 49.14****  | 49.08****  | 48.23****  | 38.75****  |           |
| 80+ yr   | 115.81**** | 115.75**** | 114.90**** | 105.42**** | 66.67**** |

Netherlands

|          | 0-9 yr        | 10-19 yr      | 20-29 yr      | 30-39 yr      | 40-49 yr      | 50-59 yr      | 60-69 yr      | 70-79 yr      | 80-89 yr  |
|----------|---------------|---------------|---------------|---------------|---------------|---------------|---------------|---------------|-----------|
| 10-19 yr | 0.00          |               |               |               |               |               |               |               |           |
| 20-29 yr | 0.00          | 0.00          |               |               |               |               |               |               |           |
| 30-39 yr | 0.00          | 0.00          | 0.00          |               |               |               |               |               |           |
| 40-49 yr | 0.00          | 0.00          | 0.00          | 0.00          |               |               |               |               |           |
| 50-59 yr | 0.17          | 0.17          | 0.17          | 0.17          | 0.17          |               |               |               |           |
| 60-69 yr | 1.04          | 1.04          | 1.04          | 1.04          | 1.04          | 0.87          |               |               |           |
| 70-79 yr | 3.41          | 3.41          | 3.41          | 3.41          | 3.41          | 3.24          | 2.36          |               |           |
| 80-89 yr | 15.42<br>**** | 15.42<br>**** | 15.42<br>**** | 15.42<br>**** | 15.42<br>**** | 15.25<br>**** | 14.38<br>**** | 12.01<br>**** |           |
| 90+ yr   | 36.60<br>**** | 36.60<br>**** | 36.60<br>**** | 36.60<br>**** | 36.60<br>**** | 36.44<br>**** | 35.56<br>**** | 33.20<br>**** | 21.19**** |

**Table S6. Tukey's post-hoc tests of pairwise age-group comparisons in COVID-19 case fatality rates within each of nine countries.** Values in Table are Q-stat. P values are indicated by \* for <0.05, \*\* for <0.01, \*\*\* for <0.001, and \*\*\*\* for <0.0001.

Italy

|          | 0-9 yr    | 10-19 yr  | 20-29 yr  | 30-39 yr  | 40-49 yr  | 50-59 yr  | 60-69 yr | 70-79 yr | 80-89 yr |
|----------|-----------|-----------|-----------|-----------|-----------|-----------|----------|----------|----------|
| 10-19 yr | 0.01      |           |           |           |           |           |          |          |          |
| 20-29 yr | 0.00      | 0.01      |           |           |           |           |          |          |          |
| 30-39 yr | 0.01      | 0.02      | 0.013     |           |           |           |          |          |          |
| 40-49 yr | 0.08      | 0.09      | 0.084     | 0.07      |           |           |          |          |          |
| 50-59 yr | 0.26      | 0.28      | 0.27      | 0.25      | 0.18      |           |          |          |          |
| 60-69 yr | 1.04      | 1.06      | 1.05      | 1.03      | 0.96      | 0.78      |          |          |          |
| 70-79 yr | 3.21      | 3.22      | 3.21      | 3.20      | 3.13      | 2.95      | 2.17     |          |          |
| 80-89 yr | 7.41****  | 7.43****  | 7.42****  | 7.40****  | 7.33****  | 7.15****  | 6.37***  | 4.20     |          |
| 90+ yr   | 10.59**** | 10.61**** | 10.60**** | 10.58**** | 10.51**** | 10.33**** | 9.55**** | 7.38**** | 3.18     |

UK

|          | 0-4 yr    | 5-9 yr    | 10-19 yr  | 20-29 yr  | 30-39 yr  | 40-49 yr  | 50-59 yr  | 60-69 yr  | 70-79 yr  |
|----------|-----------|-----------|-----------|-----------|-----------|-----------|-----------|-----------|-----------|
| 5-9 yr   | 0.14      |           |           |           |           |           |           |           |           |
| 10-19 yr | 0.23      | 0.30      |           |           |           |           |           |           |           |
| 20-29 yr | 0.09      | 0.38      | 0.08      |           |           |           |           |           |           |
| 30-39 yr | 0.47      | 0.25      | 0.05      | 0.13      |           |           |           |           |           |
| 40-49 yr | 0.16      | 0.31      | 0.61      | 0.69      | 0.56      |           |           |           |           |
| 50-59 yr | 1.71      | 1.56      | 1.86      | 1.94      | 1.81      | 1.25      |           |           |           |
| 60-69 yr | 6.33***   | 6.17***   | 6.47***   | 6.55***   | 6.42***   | 5.86**    | 4.61*     |           |           |
| 70-79 yr | 19.33**** | 19.17**** | 19.47**** | 19.55**** | 19.42**** | 18.86**** | 17.61**** | 13.00**** |           |
| 80+ yr   | 35.01**** | 34.86**** | 35.16**** | 35.24**** | 35.10**** | 34.54**** | 33.30**** | 28.69**** | 15.68**** |

South Korea

|          | 0-9 yr | 10-19 yr | 20-29 yr | 30-39 yr | 40-49 yr | 50-59 yr | 60-69 yr | 70-79 yr |
|----------|--------|----------|----------|----------|----------|----------|----------|----------|
| 10-19 yr | 0.00   |          |          |          |          |          |          |          |
| 20-29 yr | 0.00   | 0.00     |          |          |          |          |          |          |
| 30-39 yr | 0.05   | 0.05     | 0.05     |          |          |          |          |          |
| 40-49 yr | 0.06   | 0.06     | 0.06     | 0.01     |          |          |          |          |

|          |           |           |           |           |           |          |          |       |
|----------|-----------|-----------|-----------|-----------|-----------|----------|----------|-------|
| 50-59 yr | 0.15      | 0.15      | 0.15      | 0.10      | 0.09      |          |          |       |
| 60-69 yr | 1.54      | 1.54      | 1.54      | 1.49      | 1.48      | 1.39     |          |       |
| 70-79 yr | 5.11*     | 5.11*     | 5.11*     | 5.07*     | 5.06*     | 4.97*    | 3.58     |       |
| 80+ yr   | 10.13**** | 10.13**** | 10.13**** | 10.09**** | 10.06**** | 9.99**** | 8.60**** | 5.02* |

#### Germany

|          | 0-4 yr    | 5-14 yr   | 15-34 yr  | 35-59 yr  | 60-79 yr  |
|----------|-----------|-----------|-----------|-----------|-----------|
| 5-14 yr  | 0.02      |           |           |           |           |
| 15-34 yr | 0.00      | 0.02      |           |           |           |
| 35-59 yr | 0.43      | 0.44      | 0.43      |           |           |
| 60-79 yr | 4.94**    | 4.95**    | 4.94**    | 4.51*     |           |
| 80+ yr   | 22.76**** | 22.78**** | 22.76**** | 22.34**** | 17.83**** |

#### South Africa

|          | 0-9 yr    | 10-19 yr  | 20-29 yr  | 30-39 yr  | 40-49 yr  | 50-59 yr  | 60-69 yr | 70-79 yr |
|----------|-----------|-----------|-----------|-----------|-----------|-----------|----------|----------|
| 10-19 yr | 0.21      |           |           |           |           |           |          |          |
| 20-29 yr | 0.04      | 0.17      |           |           |           |           |          |          |
| 30-39 yr | 0.29      | 0.50      | 0.34      |           |           |           |          |          |
| 40-49 yr | 1.24      | 1.46      | 1.29      | 0.95      |           |           |          |          |
| 50-59 yr | 3.76      | 3.97      | 3.81      | 3.47      | 2.52      |           |          |          |
| 60-69 yr | 9.43****  | 9.64****  | 9.48****  | 9.14****  | 8.19****  | 5.67**    |          |          |
| 70-79 yr | 14.56**** | 14.78**** | 14.61**** | 14.27**** | 13.32**** | 10.80**** | 5.13**   |          |
| 80+ yr   | 16.94**** | 17.15**** | 16.98**** | 16.65**** | 15.69**** | 13.18**** | 7.51**** | 2.37     |

#### Portugal

|          | 0-9 yr | 10-19 yr | 20-29 yr | 30-39 yr | 40-49 yr | 50-59 yr | 60-69 yr | 70-79 yr |
|----------|--------|----------|----------|----------|----------|----------|----------|----------|
| 10-19 yr | 0.00   |          |          |          |          |          |          |          |
| 20-29 yr | 0.03   | 0.03     |          |          |          |          |          |          |
| 30-39 yr | 0.05   | 0.05     | 0.02     |          |          |          |          |          |
| 40-49 yr | 0.20   | 0.20     | 0.17     | 0.15     |          |          |          |          |
| 50-59 yr | 0.73   | 0.73     | 0.70     | 0.68     | 0.53     |          |          |          |
| 60-69 yr | 3.18   | 3.18     | 3.15     | 3.13     | 2.97     | 2.45     |          |          |

|          |           |           |           |           |           |           |           |           |
|----------|-----------|-----------|-----------|-----------|-----------|-----------|-----------|-----------|
| 70-79 yr | 10.22**** | 10.22**** | 10.19**** | 10.17**** | 10.02**** | 9.49****  | 7.04****  |           |
| 80+ yr   | 24.20**** | 24.20**** | 24.17**** | 24.15**** | 24.00**** | 23.47**** | 21.02**** | 13.98**** |

Turkey

|          | 0-14 yr   | 15-24 yr  | 25-49 yr  | 50-64 yr  | 65-79 yr  |
|----------|-----------|-----------|-----------|-----------|-----------|
| 15-24 yr | 0.02      |           |           |           |           |
| 25-49 yr | 0.10      | 0.12      |           |           |           |
| 50-64 yr | 1.64      | 1.66      | 1.54      |           |           |
| 65-79 yr | 8.29****  | 8.31****  | 8.19****  | 6.65***   |           |
| 80+ yr   | 20.46**** | 20.48**** | 20.37**** | 18.82**** | 12.17**** |

Peru

|          | 0-9 yr    | 10-19 yr  | 20-29 yr  | 30-39 yr  | 40-49 yr  | 50-59 yr  | 60-69 yr  | 70-79 yr  |
|----------|-----------|-----------|-----------|-----------|-----------|-----------|-----------|-----------|
| 10-19 yr | 0.18      |           |           |           |           |           |           |           |
| 20-29 yr | 0.34      | 0.52      |           |           |           |           |           |           |
| 30-39 yr | 0.28      | 0.10      | 0.62      |           |           |           |           |           |
| 40-49 yr | 1.99      | 1.81      | 2.33      | 1.71      |           |           |           |           |
| 50-59 yr | 5.91**    | 5.73**    | 6.25***   | 5.62**    | 3.92      |           |           |           |
| 60-69 yr | 15.94**** | 15.76**** | 16.28**** | 15.65**** | 13.95**** | 10.03**** |           |           |
| 70-79 yr | 28.82**** | 28.64**** | 29.16**** | 28.54**** | 26.83**** | 22.91**** | 12.88**** |           |
| 80+ yr   | 45.60**** | 45.42**** | 45.94**** | 45.32**** | 43.61**** | 39.70**** | 29.66**** | 16.78**** |

Netherlands

|          | 0-9 yr    | 10-19 yr  | 20-29 yr  | 30-39 yr  | 40-49 yr  | 50-59 yr  | 60-69 yr  | 70-79 yr | 80-89 yr |
|----------|-----------|-----------|-----------|-----------|-----------|-----------|-----------|----------|----------|
| 10-19 yr | 0.00      |           |           |           |           |           |           |          |          |
| 20-29 yr | 0.00      | 0.00      |           |           |           |           |           |          |          |
| 30-39 yr | 0.00      | 0.00      | 0.00      |           |           |           |           |          |          |
| 40-49 yr | 0.00      | 0.00      | 0.00      | 0.00      |           |           |           |          |          |
| 50-59 yr | 0.31      | 0.31      | 0.31      | 0.31      | 0.31      |           |           |          |          |
| 60-69 yr | 1.63      | 1.63      | 1.63      | 1.63      | 1.63      | 1.32      |           |          |          |
| 70-79 yr | 6.62***   | 6.62***   | 6.62***   | 6.62***   | 6.62***   | 6.31***   | 5.00*     |          |          |
| 80-89 yr | 14.71**** | 14.71**** | 14.71**** | 14.71**** | 14.71**** | 14.40**** | 13.08**** | 8.08**** |          |

|        |           |           |           |           |           |           |           |           |         |
|--------|-----------|-----------|-----------|-----------|-----------|-----------|-----------|-----------|---------|
| 90+ yr | 21.30**** | 21.30**** | 21.30**** | 21.30**** | 21.30**** | 20.99**** | 19.67**** | 14.68**** | 6.60*** |
|--------|-----------|-----------|-----------|-----------|-----------|-----------|-----------|-----------|---------|

**Table S7. Tukey's post-hoc tests of pairwise age-group comparisons in the weekly changes of case proportions caused by COVID-19 in one country that showed significant differences between at least two age groups.** Values in Table are Q-stat. P values are indicated by \* for <0.05, \*\* for <0.01, \*\*\* for <0.001, and \*\*\*\* for <0.0001.

UK

|          | 0-4 yr | 5-9 yr | 10-19 yr | 20-29 yr | 30-39 yr | 40-49 yr | 50-59 yr | 60-69 yr | 70-79 yr |
|----------|--------|--------|----------|----------|----------|----------|----------|----------|----------|
| 5-9 yr   | 0.09   |        |          |          |          |          |          |          |          |
| 10-19 yr | 1.24   | 1.33   |          |          |          |          |          |          |          |
| 20-29 yr | 1.33   | 1.42   | 0.09     |          |          |          |          |          |          |
| 30-39 yr | 0.51   | 0.60   | 0.73     | 0.82     |          |          |          |          |          |
| 40-49 yr | 0.24   | 0.32   | 1.01     | 1.09     | 0.28     |          |          |          |          |
| 50-59 yr | 0.06   | 0.15   | 1.18     | 1.27     | 0.45     | 0.18     |          |          |          |
| 60-69 yr | 0.32   | 0.23   | 1.56     | 1.65     | 0.83     | 0.56     | 0.38     |          |          |
| 70-79 yr | 1.14   | 1.05   | 2.38     | 2.47     | 1.65     | 1.37     | 1.19     | 0.82     |          |
| 80+ yr   | 5.44** | 5.35** | 6.68***  | 6.77***  | 5.95**   | 5.68**   | 5.50**   | 5.12*    | 4.30     |



| F values based on logit data |           |         |                                                   |
|------------------------------|-----------|---------|---------------------------------------------------|
| Country                      | Age-group | Sex     | Number of data points                             |
| Italy                        | 5.20****  | 0.02 NS | 39 (dropped two weeks because of NA logit values) |
| US                           | 27.48**** | 0.17 NS | 42                                                |
| UK                           | 20.84**** | 1.80 NS | 21                                                |

| F values based on relative proportions data |            |         |                       |
|---------------------------------------------|------------|---------|-----------------------|
| Country                                     | Age-group  | Sex     | Number of data points |
| Italy                                       | 39.59****  | 1.64 NS | 41                    |
| US                                          | 186.23**** | 6.91**  | 42                    |
| UK                                          | 36.70****  | 5.77*   | 21                    |

| Italy Logit Tukey's Post-Hoc Test |           |             |             |             |             |             |             |             |             |
|-----------------------------------|-----------|-------------|-------------|-------------|-------------|-------------|-------------|-------------|-------------|
|                                   | 0-9 years | 10-19 years | 20-29 years | 30-39 years | 40-49 years | 50-59 years | 60-69 years | 70-79 years | 80-89 years |
| 10-19 years                       | 2.49 NS   |             |             |             |             |             |             |             |             |
| 20-29 years                       | 5.96**    | 3.46 NS     |             |             |             |             |             |             |             |
| 30-39 years                       | 5.44**    | 2.94 NS     | 0.52 NS     |             |             |             |             |             |             |
| 40-49 years                       | 5.20*     | 2.71 NS     | 0.76 NS     | 0.23 NS     |             |             |             |             |             |
| 50-59 years                       | 5.38**    | 2.89 NS     | 0.57 NS     | 0.05 NS     | 0.18 NS     |             |             |             |             |
| 60-69 years                       | 4.25 NS   | 1.76 NS     | 1.70 NS     | 1.18 NS     | 0.95 NS     | 1.13 NS     |             |             |             |
| 70-79 years                       | 4.18 NS   | 1.69 NS     | 1.77 NS     | 1.25 NS     | 1.02 NS     | 1.20 NS     | 0.07 NS     |             |             |
| 80-89 years                       | 6.12***   | 3.62 NS     | 0.16 NS     | 0.68 NS     | 0.92 NS     | 0.73 NS     | 1.86 NS     | 1.93 NS     |             |
| 90+ years                         | 8.58****  | 6.08***     | 2.62 NS     | 3.14 NS     | 3.37 NS     | 3.19 NS     | 4.32 NS     | 4.39 NS     | 2.46 NS     |

Italy Relative Proportions Tukey's Post-Hoc Test

|             | 0-9 years | 10-19 years | 20-29 years | 30-39 years | 40-49 years | 50-59 years | 60-69 years | 70-79 years | 80-89 years |
|-------------|-----------|-------------|-------------|-------------|-------------|-------------|-------------|-------------|-------------|
| 10-19 years | 4.31****  |             |             |             |             |             |             |             |             |
| 20-29 years | 11.70**** | 7.39****    |             |             |             |             |             |             |             |
| 30-39 years | 8.49****  | 4.19        | 3.21        |             |             |             |             |             |             |
| 40-49 years | 6.95****  | 2.64        | 4.76*       | 1.55        |             |             |             |             |             |
| 50-59 years | 7.15*     | 2.84        | 4.55*       | 1.35        | 0.22        |             |             |             |             |
| 60-69 years | 4.69*     | 0.38        | 7.01****    | 3.81        | 2.26        | 2.46        |             |             |             |
| 70-79 years | 4.56****  | 0.25        | 7.15****    | 3.94        | 2.39        | 2.59        | 0.13        |             |             |
| 80-89 years | 10.58**** | 6.27***     | 1.121       | 2.09        | 3.64        | 3.44        | 5.90**      | 6.03***     |             |
| 90+ years   | 23.29**** | 18.98****   | 11.58****   | 14.79****   | 16.34****   | 16.14****   | 19.60****   | 18.73****   | 12.70****   |

| US Logit Tukey's Post-Hoc Test |           |             |             |             |             |             |             |             |
|--------------------------------|-----------|-------------|-------------|-------------|-------------|-------------|-------------|-------------|
|                                | 0-9 years | 10-19 years | 20-29 years | 30-39 years | 40-49 years | 50-59 years | 60-69 years | 70-79 years |
| 10-19 years                    | 8.94****  |             |             |             |             |             |             |             |
| 20-29 years                    | 16.17**** | 7.23****    |             |             |             |             |             |             |
| 30-39 years                    | 15.57**** | 6.63***     | 0.60 NS     |             |             |             |             |             |
| 40-49 years                    | 15.94**** | 7.00****    | 0.23 NS     | 0.37 NS     |             |             |             |             |
| 50-59 years                    | 15.38**** | 6.44***     | 0.79 NS     | 0.19 NS     | 0.56 NS     |             |             |             |
| 60-69 years                    | 13.02**** | 4.09 NS     | 3.15 NS     | 2.55 NS     | 2.92 NS     | 2.36 NS     |             |             |
| 70-79 years                    | 12.01**** | 3.07 NS     | 4.16 NS     | 3.56 NS     | 3.93 NS     | 3.37 NS     | 1.01 NS     |             |
| 80-89 years                    | 15.20**** | 6.26***     | 0.97 NS     | 0.37 NS     | 0.74 NS     | 0.18 NS     | 2.17 NS     | 3.19 NS     |

| US Relative Proportions Tukey's Post-Hoc Test |           |             |             |             |             |             |             |             |
|-----------------------------------------------|-----------|-------------|-------------|-------------|-------------|-------------|-------------|-------------|
|                                               | 0-9 years | 10-19 years | 20-29 years | 30-39 years | 40-49 years | 50-59 years | 60-69 years | 70-79 years |
| 10-19 years                                   | 17.04**** |             |             |             |             |             |             |             |
| 20-29 years                                   | 41.71**** | 24.67****   |             |             |             |             |             |             |
| 30-39 years                                   | 37.21**** | 20.17****   | 4.5*        |             |             |             |             |             |
| 40-49 years                                   | 39.03**** | 22****      | 2.67        | 1.83        |             |             |             |             |

|             |           |           |           |           |           |           |           |           |
|-------------|-----------|-----------|-----------|-----------|-----------|-----------|-----------|-----------|
| 50-59 years | 36.29**** | 19.25**** | 5.42**    | 0.92      | 2.75      |           |           |           |
| 60-69 years | 26.25**** | 9.21****  | 15.46**** | 10.95**** | 12.78**** | 10.03**** |           |           |
| 70-79 years | 22.66**** | 5.62**    | 19.05**** | 14.55**** | 16.38**** | 13.63**** | 3.6       |           |
| 80-89 years | 37.74**** | 20.7****  | 3.97      | 0.53      | 1.29      | 1.45      | 11.49**** | 15.08**** |

| UK Logit Tukey's Post-Hoc Test |           |           |             |             |             |             |             |             |             |
|--------------------------------|-----------|-----------|-------------|-------------|-------------|-------------|-------------|-------------|-------------|
|                                | 0-4 years | 5-9 years | 10-19 years | 20-29 years | 30-39 years | 40-49 years | 50-59 years | 60-69 years | 70-79 years |
| 5-9 years                      | 0.25 NS   |           |             |             |             |             |             |             |             |
| 10-19 years                    | 5.51**    | 5.26**    |             |             |             |             |             |             |             |
| 20-29 years                    | 12.17**** | 11.92**** | 6.66***     |             |             |             |             |             |             |
| 30-39 years                    | 10.92**** | 10.67**** | 5.41**      | 1.25 NS     |             |             |             |             |             |
| 40-49 years                    | 10.24**** | 9.99****  | 4.73*       | 1.93 NS     | 0.68 NS     |             |             |             |             |
| 50-59 years                    | 9.19****  | 8.94****  | 3.68 NS     | 2.98 NS     | 1.73 NS     | 1.05 NS     |             |             |             |
| 60-69 years                    | 7.02****  | 6.77***   | 1.51 NS     | 5.15*       | 3.90 NS     | 3.22 NS     | 2.17 NS     |             |             |
| 70-79 years                    | 5.54**    | 5.28**    | 0.03 NS     | 6.63***     | 5.38**      | 4.70**      | 3.66 NS     | 1.48 NS     |             |
| 80+ years                      | 12.70**** | 12.44**** | 7.19****    | 0.53 NS     | 1.78 NS     | 2.46 NS     | 3.51 NS     | 5.68**      | 7.16****    |

| UK Relative Proportions Tukey's Post-Hoc Test |           |           |             |             |             |             |             |             |             |
|-----------------------------------------------|-----------|-----------|-------------|-------------|-------------|-------------|-------------|-------------|-------------|
|                                               | 0-4 years | 5-9 years | 10-19 years | 20-29 years | 30-39 years | 40-49 years | 50-59 years | 60-69 years | 70-79 years |
| 5-9 years                                     | 0.01      |           |             |             |             |             |             |             |             |
| 10-19 years                                   | 4.70*     | 4.69*     |             |             |             |             |             |             |             |
| 20-29 years                                   | 14.21**** | 14.20**** | 9.51****    |             |             |             |             |             |             |
| 30-39 years                                   | 10.45**** | 10.45**** | 5.75**      | 3.755       |             |             |             |             |             |
| 40-49 years                                   | 8.92****  | 8.91****  | 4.22        | 5.287**     | 1.53        |             |             |             |             |
| 50-59 years                                   | 7.10****  | 7.09****  | 2.4         | 7.113****   | 3.36        | 1.83        |             |             |             |
| 60-69 years                                   | 4.11      | 4.11      | 0.59        | 10.095****  | 6.34***     | 4.81*       | 2.98        |             |             |

|                |           |           |           |            |          |         |           |           |           |
|----------------|-----------|-----------|-----------|------------|----------|---------|-----------|-----------|-----------|
| 70-79<br>years | 3.25      | 3.24      | 1.45      | 10.961**** | 7.21**** | 5.67**  | 3.85      | 0.87      |           |
| 80+ years      | 18.72**** | 18.71**** | 14.02**** | 4.512****  | 8.27**** | 9.8**** | 11.63**** | 14.61**** | 15.47**** |

Table S9. Temporal patterns of COVID-19 infection cases using the formula of  $N_{t+1}/N_t$  between weeks  
P values are indicated by \* for <0.05/n, \*\* for <0.01/n, \*\*\* for <0.001/n, and \*\*\*\* for <0.0001/n, where n is the number of age groups for that specific country

Italy Cases

|        | 0-9 yr | 10-19 yr | 20-29 yr | 30-39 yr | 40-49 yr | 50-59 yr | 60-69 yr | 70-79 yr | 80-89 yr | 90+ yr |
|--------|--------|----------|----------|----------|----------|----------|----------|----------|----------|--------|
| Male   | 0.17NS | 0.08NS   | 0.08NS   | 0.12NS   | 0.24NS   | 0.20NS   | 0.25NS   | 0.30NS   | 0.27NS   | 0.18NS |
| Female | 0.13NS | 0.03NS   | 0.09NS   | 0.18NS   | 0.20NS   | 0.19NS   | 0.22NS   | 0.23NS   | 0.19NS   | 0.17NS |

UK Cases

|        | 0-4 yr | 5-9 yr  | 10-19 yr | 20-29 yr | 30-39 yr | 40-49 yr | 50-59 yr | 60-69 yr | 70-79 yr | 80+ yr  |
|--------|--------|---------|----------|----------|----------|----------|----------|----------|----------|---------|
| Male   | 0.11NS | -0.26NS | -0.25NSS | -0.26NS  | -0.26NS  | -0.25NS  | -0.24NS  | -0.17NS  | 0.19NS   | 0.17NS  |
| Female | 0.11NS | -0.27NS | -0.27NS  | -0.24NS  | -0.24NS  | -0.24NS  | -0.24NS  | -0.21NS  | 0.07NS   | -0.00NS |

USA Cases

|        | 0-9 yr | 10-19 yr | 20-29 yr | 30-39 yr | 40-49 yr | 50-59 yr | 60-69 yr | 70-79 yr | 80-89 yr |
|--------|--------|----------|----------|----------|----------|----------|----------|----------|----------|
| Male   | -0.44* | -0.38NS  | -0.38NSS | -0.34NS  | -0.34NS  | -0.33NS  | -0.31NS  | -0.32NS  | -0.36NS  |
| Female | -0.44* | -0.45*   | -0.39NS  | -0.36NS  | -0.35NS  | -0.34NS  | -0.32NS  | -0.34NS  | -0.39NS  |
